# Supplementary material
Source: PubMed Central journal article supplement (PMC3174607)
Supplement: 1106189108_pnas.201106189SI.pdf [file 1106189108_pnas.201106189SI.pdf]

# Supporting Information

Burkhardt et al. 10.1073/pnas.1106189108

## SI Experimental Procedures

**Structure Determination and Refinement.** Diffraction data were integrated and scaled with XDS (1). The structure was solved by molecular replacement using Phaser (2). The search model was generated by pruning nonconserved residues of the neuronal Munc18-1/syntaxin 1a complex (PDB ID code 3C98; ref. 3) to alanines with Chainsaw (4). The asymmetric unit contains one Munc18/syntaxin 1 complex. The model was refined by using simulated annealing, gradient minimization, and individual isotropic B-factor refinement as implemented in Phenix (5) alternated by rebuilding cycles using the program Coot (6). In a final step, tensor elements describing the anisotropic displacement of four individual domains of Munc18 and four regions of syntaxin 1 were refined by using the Translation/Libration/Screw (TLS) implementation of Phenix. The final *R* factor is 0.188 with a  $R_{\text{free}}$  of 0.258. The final model comprises Munc18 residues 1–509 and 561–616, syntaxin 1 residues 2–15, 39–192, and 210–261, and 48 water molecules (Table S1). Figures were generated with the program Pymol (7). The coordinates have been deposited in the RCSB Protein Data Bank (ID code 2XHE) and will be released upon publication.

**Phylogeny.** Phylogenetic reconstruction was essentially done as described in ref. 8. To gain insights into the phylogenetic placement of the core factors of the secretory machinery from the choanoflagellate *M. brevicollis*, we included sequences from 15 selected animal species, 7 selected fungal species, 6 selected plant species, and 3 protists for the construction of the phylogenetic trees. The sequences of the secretory SNARE proteins (i.e., type IV) were downloaded from our SNARE database <http://bioinformatics.mpibpc.mpg.de/snare>. The sequences of the secretory SM proteins were gathered from the nr-database at National Center for Biotechnology Information and few genome projects from the Department of Energy Joint Genome Institute. The species list and abbreviations and the sequence identity

numbers of the used sequences can be found in Table S2 and Table S3. We then aligned each factor by using muscle (9).

Phylogenetic reconstruction was composed of two different analytical approaches. The first approach used Important Quartet Puzzling and Nearest Neighbor Interchange (IQPNNI) (10) to construct phylogenetic trees from the curated alignments. We used a gamma distribution as a model for rate heterogeneity with four rate categories for the estimation of the gamma distribution parameter. The proportion of invariable sites was estimated from the data and the Jones, Taylor, and Thornton (JTT) distance matrix (11) served as a substitution matrix. We used the stopping rule of IQPNNI, but the calculation had to run for at least the suggested number of iterations. The default values were used for the remaining parameter. In addition, likelihood mapping was applied to determine the confidence of the edges in the calculated trees. The second approach used the phylip package (12) to apply a distance-based bootstrap analysis with 1,000 replicates to each of the curated alignments. Standard settings were used for seqboot, the JTT distance matrix, and also a gamma distribution (with parameter approximation from tree puzzle) for protdist, as were standard options for neighbor. If required, the random seed was set to nine. We used the almost unbiased (AU) test (13) to address the systematically biased bootstrap values. We obtained the sitewise log-likelihoods needed for the AU test by using a modified version of phylml (14), and the test was performed by using consel (15). The reconstructed IQPNNI trees served as starting points to join the results of both calculations. The inner edges of the trees were labeled with their likelihood mapping and corrected bootstrap support values.

**Electrophoretic Procedures.** SDS resistance of ternary SNARE complexes in polyacrylamide gels (16) was tested as described (17) with the modification that the complexes were visualized by the incorporation of synaptobrevin (1-75) labeled with the fluorescent dye Texas red at cysteine 58.

- Kabsch W (1993) Automatic processing of rotation diffraction data from crystals of initially unknown symmetry and cell constants. *J Appl Cryst* 26:795–800.
- McCoy AJ, Grosse-Kunstleve RW, Storoni LC, Read RJ (2005) Likelihood-enhanced fast translation functions. *Acta Crystallogr D Biol Crystallogr* 61:458–464.
- Burkhardt P, Hattendorf DA, Weis WI, Fasshauer D (2008) Munc18a controls SNARE assembly through its interaction with the syntaxin N-peptide. *EMBO J* 27:923–933.
- Stein N (2008) CHAINSAW: A program for mutating pdb files used as templates in molecular replacement. *J Appl Cryst* 41:641–643.
- Adams PD, et al. (2004) Recent developments in the PHENIX software for automated crystallographic structure determination. *J Synchrotron Radiat* 11:53–55.
- Emsley P, Cowtan K (2004) Coot: Model-building tools for molecular graphics. *Acta Crystallogr D Biol Crystallogr* 60:2126–2132.
- DeLano WL (2002) *The PyMOL Molecular Graphics System* (DeLano Scientific, Palo Alto, CA).
- Klopper TH, Kienle CN, Fasshauer D (2007) An elaborate classification of SNARE proteins sheds light on the conservation of the eukaryotic endomembrane system. *Mol Biol Cell* 18:3463–3471.
- Edgar RC (2004) MUSCLE: A multiple sequence alignment method with reduced time and space complexity. *BMC Bioinformatics* 5:113.
- Vinh S, Von Haeseler A (2004) IQPNNI: Moving fast through tree space and stopping in time. *Mol Biol Evol* 21:1565–1571.
- Jones DT, Taylor WR, Thornton JM (1992) The rapid generation of mutation data matrices from protein sequences. *Comput Appl Biosci* 8:275–282.
- Felsenstein J (1998) PHYLIP - Phylogeny inference package (Version 3.2). *Cladistics* 5: 164–166.
- Shimodaira H (2002) An approximately unbiased test of phylogenetic tree selection. *Syst Biol* 51:492–508.
- Guindon S, Gascuel O (2003) A simple, fast, and accurate algorithm to estimate large phylogenies by maximum likelihood. *Syst Biol* 52:696–704.
- Shimodaira H, Hasegawa M (2001) CONSEL: For assessing the confidence of phylogenetic tree selection. *Bioinformatics* 17:1246–1247.
- Hayashi T, et al. (1994) Synaptic vesicle membrane fusion complex: Action of clostridial neurotoxins on assembly. *EMBO J* 13:5051–5061.
- Fasshauer D, Antonin W, Margittai M, Pabst S, Jahn R (1999) Mixed and non-cognate SNARE complexes. Characterization of assembly and biophysical properties. *J Biol Chem* 274:15440–15446.
- Dulubova I, et al. (1999) A conformational switch in syntaxin during exocytosis: Role of munc18. *EMBO J* 18:4372–4382.
- Misura KM, Scheller RH, Weis WI (2000) Three-dimensional structure of the neuronal Sec1-syntaxin 1a complex. *Nature* 404:355–362.
- Munson M, Chen X, Cocina AE, Schultz SM, Hughson FM (2000) Interactions within the yeast t-SNARE Sso1p that control SNARE complex assembly. *Nat Struct Biol* 7: 894–902.
- Margittai M, et al. (2003) Single-molecule fluorescence resonance energy transfer reveals a dynamic equilibrium between closed and open conformations of syntaxin 1. *Proc Natl Acad Sci USA* 100:15516–15521.
- Weimer RM, et al. (2006) UNC-13 and UNC-10/rim localize synaptic vesicles to specific membrane domains. *J Neurosci* 26:8040–8047.
- Gerber SH, et al. (2008) Conformational switch of syntaxin-1 controls synaptic vesicle fusion. *Science* 321:1507–1510.
- Hu SH, Latham CF, Gee CL, James DE, Martin JL (2007) Structure of the Munc18c/Syntaxin4 N-peptide complex defines universal features of the N-peptide binding mode of Sec1/Munc18 proteins. *Proc Natl Acad Sci USA* 104:8773–8778.
- Hu SH, et al. (2011) Possible roles for Munc18-1 domain 3a and Syntaxin1 N-peptide and C-terminal anchor in SNARE complex formation. *Proc Natl Acad Sci USA* 108: 1040–1045.
- Peng RW, Guetg C, Abellan E, Fussenegger M (2010) Munc18b regulates core SNARE complex assembly and constitutive exocytosis by interacting with the N-peptide and the closed-conformation C-terminus of syntaxin 3. *Biochem J* 431:353–361.
- Lovell SC, et al. (2003) Structure validation by Calpha geometry: Phi, psi and Cbeta deviation. *Proteins* 50:437–450.

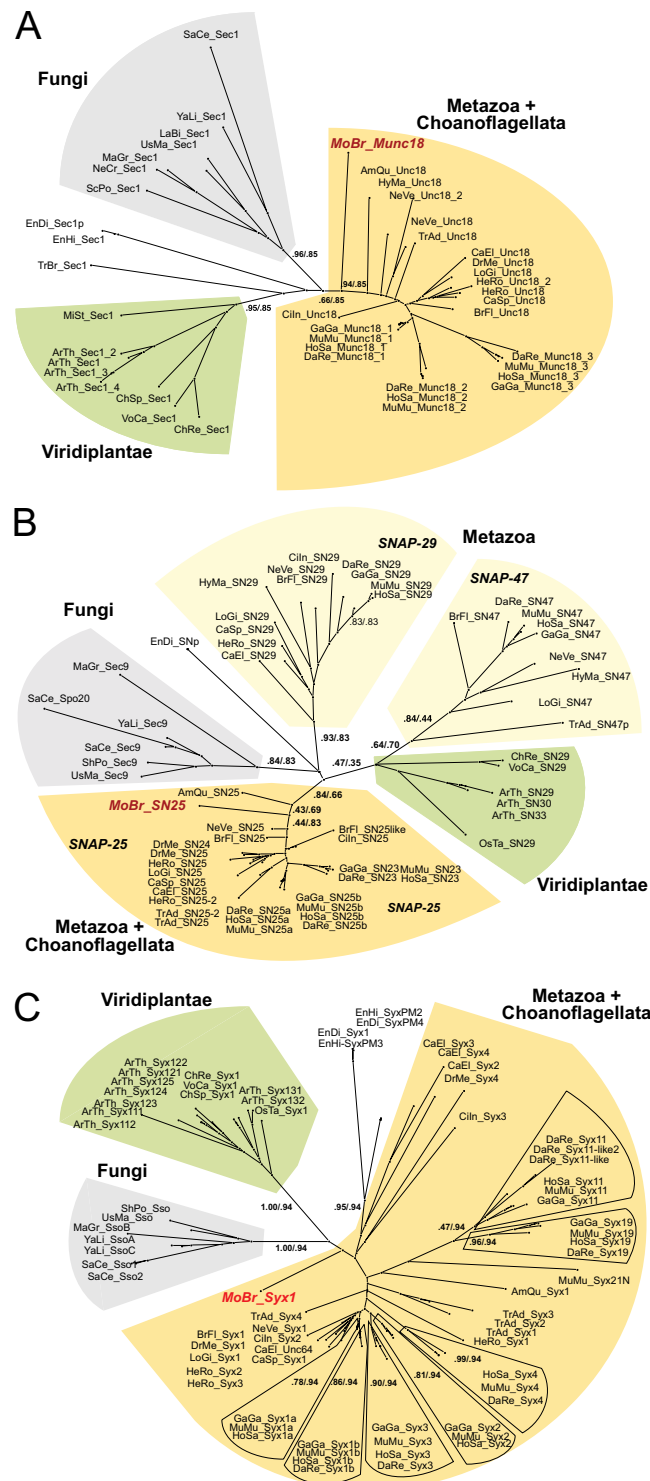

**Fig. S1.** Detailed versions of the phylogenetic trees of the SM protein Munc18 (A), the Qbc-SNARE SNAP-25 (B), and secretory syntaxins (C) (type Qa.IV) shown in Fig. 1. The major phylogenetic lineages are indicated by different colors. The labels on the major branches represent the likelihood mapping (left) and almost unbiased (AU) support values (right). The species abbreviations and sequences used are given in Table S2 and Table S3. Whereas *M. brevicollis* possesses only one factor each, duplications occurred recurrently in different animal lineages. A noteworthy expansion of Munc18-like factors occurred in vertebrates, giving rise to the three isoforms Munc18-1, -2, and -3. A more prominent expansion took place in secretory syntaxins in vertebrates (8). Interestingly, the SNAP-25-like protein found in *M. brevicollis* is closely related to the neuronal SNAP-25 of animals (8), whereas the sequences of the other two Qbc-SNAREs animal homologs SNAP-29 and SNAP-47, have diverged substantially.

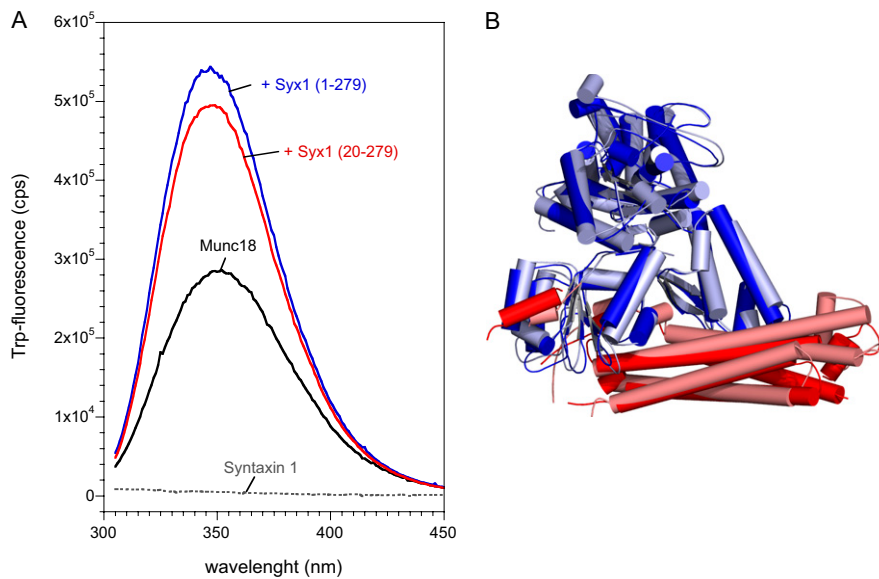

**Fig. S2.** Change of intrinsic fluorescence upon binding of Munc18 to syntaxin 1 (A) and overlay of the Munc18/Syx1 complexes (B). (A) Baseline corrected tryptophan fluorescence emission spectra of Syx1 (1-279), Munc18, Munc18 mixed with Syx1 (1-279), and Munc18 mixed with Syx1 (20-279) (500 nM each) after excitation at 295 nm. Upon addition of Syx1 (1-279) or Syx1 (20-279) to Munc18-1, an increase in fluorescence was monitored. Note that syntaxin 1 does not possess a tryptophan. Interestingly, the increase in tryptophan fluorescence in the presence of Syx1 (20-279) was somewhat less pronounced than in the presence of Syx1 (1-279). A similar difference in the fluorescence change was observed for the rat homologs. This change in fluorescence suggests that both syntaxin variants adopt a slightly different conformation in complex with Munc18. It seems likely that the increase in tryptophan fluorescence is caused by close proximity of Trp-24 of *M. brevicollis* Munc18 (Trp-28 of rat Munc18-1) and Phe-46 and Phe-47 of *M. brevicollis* syntaxin 1 (Phe-33 and Phe-34 of rat Syx1a). (B) Overlay of the Munc18/Syx1 complexes from *M. brevicollis* (Munc18, blue; Syx1, red) and from *R. norvegicus* (Munc18-1, light blue; Syx1a, salmon; PDB ID code 3C98) reveals their overall similarity.

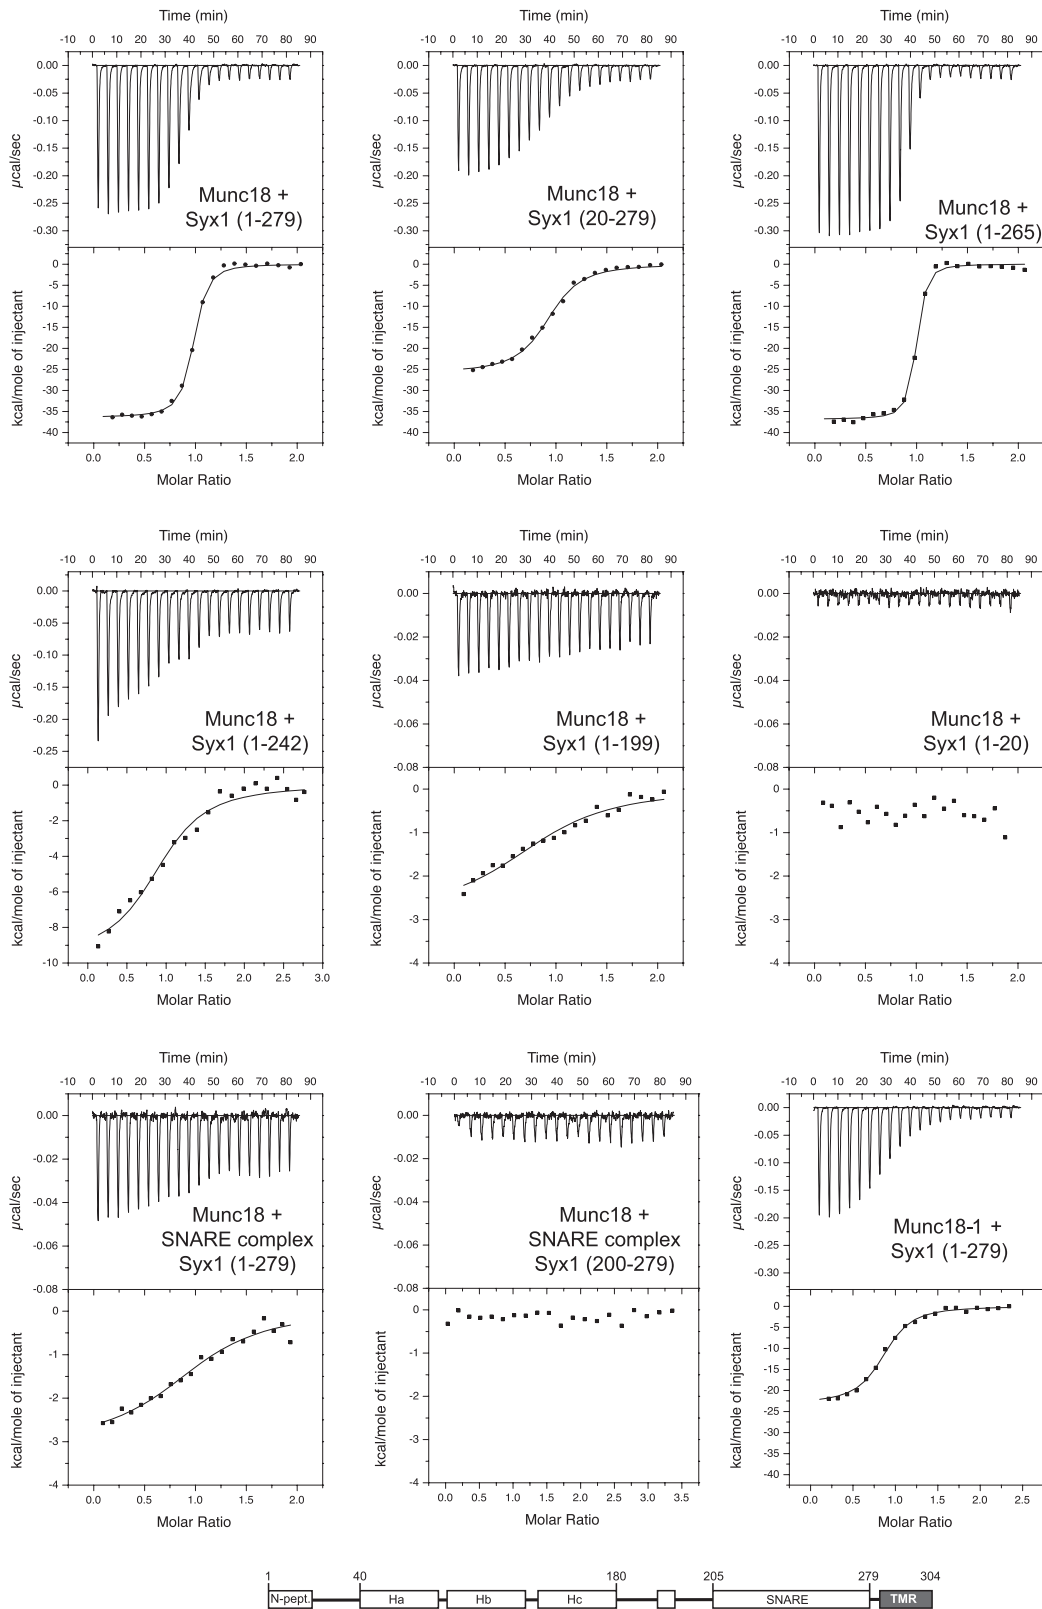

**Fig. S3.** Isothermal titration calorimetry data for the interaction of syntaxin 1 and Munc18. All isothermal calorimetric experiments were performed at 25 °C in PBS buffer. In each titration, the syntaxin 1 variant or syntaxin 1 assembled into a purified ternary SNARE complex was injected into Munc18 from *M. brevicollis* or Munc18-1 from *Rattus norvegicus* (Bottom). In each graph, Upper shows the base-line corrected raw data in power versus time during the injections. Lower displays the integrated areas normalized to the amount of the injectant ( $\text{kcal} \cdot \text{mole}^{-1}$ ) versus its molar ratio to Munc18. The solid lines represent the best fit to the data for a single binding site model by using a nonlinear least squares fit. The results of the fits are given in Table 1. For experiments performed in replicate, a representative example is shown. Most titrations using individual syntaxin 1 variants were carried out at 20  $\mu\text{M}$  syntaxin 1 and 2.5  $\mu\text{M}$  Munc18. A higher concentration was used (50  $\mu\text{M}$  and 4  $\mu\text{M}$ , respectively) for Syx1 (1-242) and (40  $\mu\text{M}$  and 4  $\mu\text{M}$ , respectively) for Syx1 (1-199) to account for the smaller heat changes upon interaction with Munc18. Similarly, 30  $\mu\text{M}$  and 3.5  $\mu\text{M}$ , respectively, were used for titrating purified SNARE complexes and Munc18.

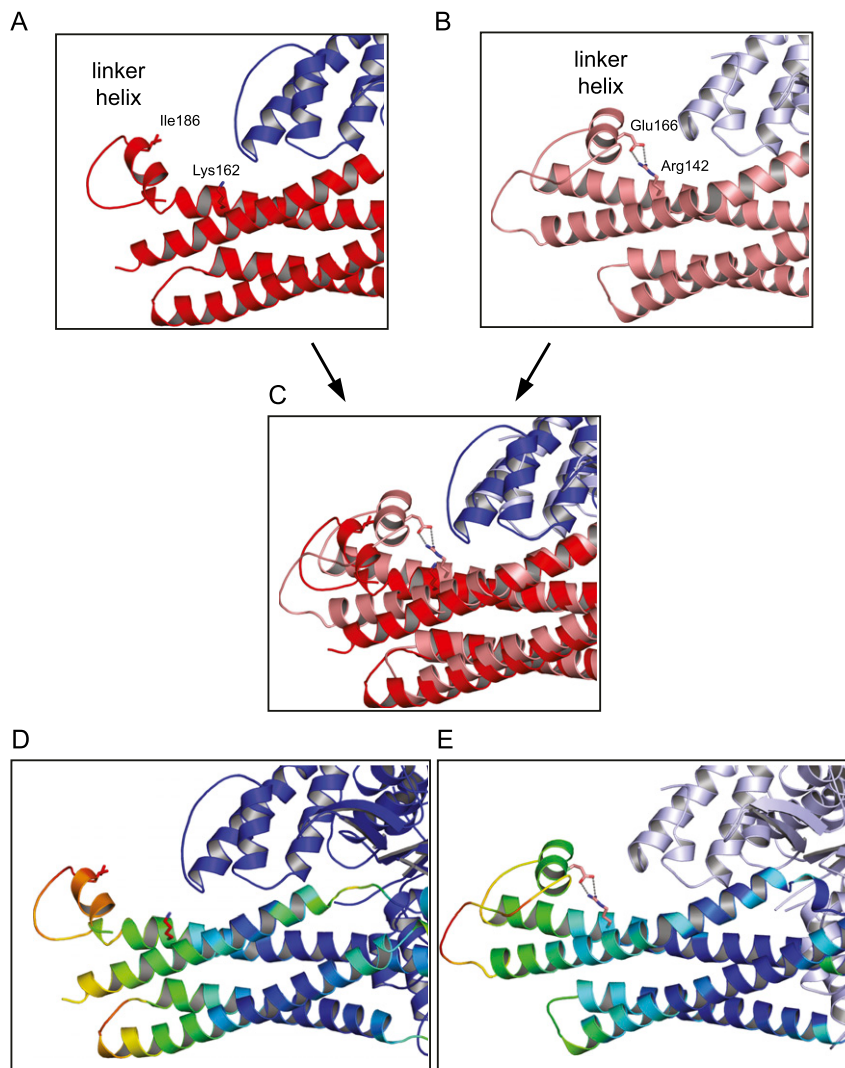

**Fig. S4.** Different conformations of the linker helix in the Munc18/syntaxin 1 complexes from *Monosiga brevicollis* and *Rattus norvegicus*. Different conformation of the linker helix of syntaxin1 from *M. brevicollis* (A) and from *R. norvegicus* (PDB ID code 3C98; ref. 3) (B). An overlay of the two structures is shown in C. In the structure from *R. norvegicus*, the orientation of the linker helix of syntaxin 1a is stabilized by the residues Glu166 of the linker helix and Arg142 of the Hb helix. This interaction is thought to stabilize the closed conformation of syntaxin 1a (18, 19). In the *M. brevicollis* structure, the corresponding residues, Ile186 and Lys162, do not interact. Nevertheless, syntaxin 1 from *M. brevicollis* adopts a closed conformation in the Munc18/syntaxin 1 complex. Interestingly, the linker of *M. brevicollis* syntaxin appears to be slightly more flexible compared with the one of rat. In fact, we observed that residues of the linker helix exhibit elevated temperature factors compared with the rest of the model (D), whereas the residues of the linker helix of the structure from *R. norvegicus* do not display elevated temperature factors (E). This difference possibly explains why the block of SNARE assembly exerted by Munc18 from *M. brevicollis* is somewhat less efficient than observed for the vertebrate homologs. Incidentally, the yeast syntaxin Sso1 has been found in a tight closed conformation in the absence of its SM partner Sec1 (20). Sso1's closed conformation is stabilized by multiple intermolecular contacts, whereas the closed conformation of syntaxin 1 of *R. norvegicus* and of *M. brevicollis* appears to be reinforced by Munc18. In fact, in isolation, rat syntaxin 1 rapidly switches between an open and closed conformation, with the majority of molecules being open (21). Of note, a double mutation in the aforementioned linker region, L165A/E166A (Syx1a<sup>LE</sup>) was used in several studies. Because this mutation was originally proposed to open up syntaxin 1a (18), it was anticipated that it would not require the activity of Munc18. Unexpectedly, however, Syx1a<sup>LE</sup> turned out to be unable to bypass the requirement for Unc18 in *C. elegans* (22). Remarkably, Munc18a-1 nonetheless tightly enfolds Syx1a<sup>LE</sup> (3), presumably in a closed conformation, yet is unable to stop it from forming a SNARE complex. It seems possible that Syx1a<sup>LE</sup> in complex with Munc18 adopts a less rigid closed conformation, which permits SNARE complex assembly independent of whether its N-peptide is bound to the outer surface of Munc18-1 (3). The less rigid closed conformation is supported by the somewhat smaller intrinsic fluorescence change observed for the mutant upon binding to Munc18-1 (3). In this context, it is interesting to note that knockout/knockin mice that express only Syx1b<sup>LE</sup> showed an enhanced fusogenicity of synaptic vesicles (23), supporting the view that Munc18-1 lost some of its control over the accessibility of syntaxin.

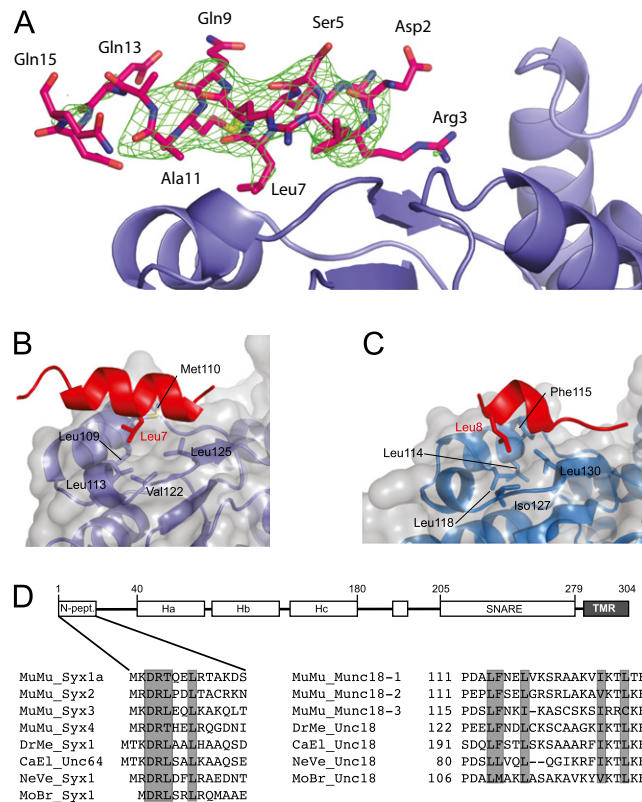

**Fig. 55.** The syntaxin 1 *N*-peptide binds to the outer surface of Munc18. (A)  $F_{obs}-F_{calc}$  omit map of the *M. brevicollis* Syx1 *N*-peptide region contoured at  $3\sigma$  (green mesh). The final model is shown as sticks (carbon: pink). Blue: *M. brevicollis* Munc18 displayed as cartoon. (B and C) Detailed view on the *N*-peptide binding pocket of the choanoflagellate and the vertebrate Munc18/syntaxin 1 complex. In *M. brevicollis*, Leu7 packs into a hydrophobic pocket formed by the residues Leu109, Met110, Leu113, Val122, and Leu125 of Munc18. The *N*-peptide is shown in red and domain 1 of Munc18 in blue (B). In *R. norvegicus*, the corresponding residue Leu8 sandwiches into the homologous hydrophobic pocket formed by the residues Leu114, Phe115, Leu118, Ile127, and Leu130. Interestingly, the ordered region of the bound *N*-peptide of syntaxin 1 is slightly longer in *M. brevicollis* (comprising residues 2–15) as in the Munc18-1-syntaxin 1a structure (residues 2–9). The overall structure of the bound syntaxin 1 *N*-peptide is similar to that of syntaxin 4 bound to Munc18-3 (24, 25), but note that so far no structure of Munc18-3 with the remainder of syntaxin 4 is available. When comparing the structure and working of the orthologous Munc18/syntaxin pairs of vertebrates, it should also be kept in mind that all three Munc18 orthologs in vertebrates originate from a single gene. Likewise, the different secretory syntaxins of vertebrates arose from gene duplications during the rise of vertebrates, suggesting that they function similarly (see, for example, ref. 26). (D) Schematic drawing of the domain structure of *M. brevicollis* syntaxin 1. Sequence alignments of the *N*-peptide of syntaxin (Left) and of the conserved *N*-peptide binding site in Munc18 (Right) from mice, fly, nematode, sea anemone, and choanoflagellate are shown. Note that the *N*-peptide of syntaxin 1 from *M. brevicollis* possesses a highly conserved DRLTxL-motif.

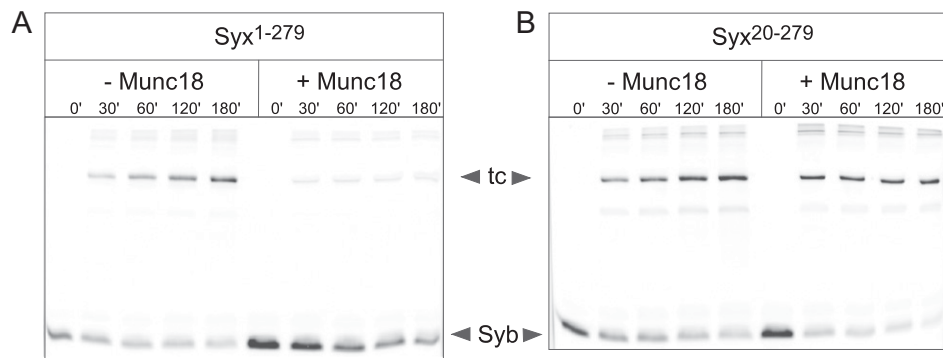

**Fig. 56.** Assembly of SDS-resistant SNARE complexes for syntaxin with (Syx1-279) and without *N*-peptide (Syx20-279) in the absence or presence of Munc18. Assembly of SNARE complexes in the absence or presence of Munc18 was monitored by the formation of SDS-resistant complexes (tc) containing synaptobrevin labeled with the fluorescent dye Texas red at Cys58. For both syntaxin 1 variants, Syx1 (1-279) and Syx1 (20-279), SNARE complexes formed in the absence of Munc18. In the presence of Munc18, however, SNARE complex formation was inhibited for Syx1 (1-279) (A), whereas a clear SDS-resistant band was visible for Syx1 (20-279) (B).

**Table S1. Crystallographic data and refinement statistics**

| Measurement                                 | Value              |
|---------------------------------------------|--------------------|
| Wavelength, Å                               | 1.0385             |
| Temperature, K                              | 100                |
| Space group                                 | P6 <sub>5</sub> 22 |
| Unit cell parameters, Å                     |                    |
| <i>a</i> , <i>b</i>                         | 146.2              |
| <i>c</i>                                    | 214.8              |
| Resolution, Å                               | 35.0–2.8 (2.9–2.8) |
| Reflections                                 |                    |
| Unique                                      | 30,089             |
| Completeness, %                             | 99.9 (100)         |
| Redundancy                                  | 14.7 (14.3)        |
| Mean $I/\sigma(I)$                          | 19.8 (2.1)         |
| $R_{\text{sym}}(I)^*$ , %                   | 10.0 (75.4)        |
| Refinement                                  |                    |
| Resolution, Å                               | 35.0–2.8           |
| Reflections                                 |                    |
| Number                                      | 30,041             |
| Completeness, %                             | 99.9               |
| Test set, %                                 | 5                  |
| $R_{\text{work}}^{\dagger}$ , %             | 18.8               |
| $R_{\text{free}}^{\dagger}$ , %             | 25.0               |
| ESU, Å                                      | 0.39               |
| Contents of A.U.                            |                    |
| Complexes/protein molecules/residues/ atoms | 1/2/835/6,315      |
| Water oxygens                               | 48                 |
| Mean B factors, Å <sup>2</sup>              |                    |
| Wilson                                      | 75.2               |
| Protein                                     | 104.8              |
| Water                                       | 70.8               |
| Ramachandran plot <sup>‡</sup> , %          |                    |
| Preferred                                   | 89.3               |
| Allowed                                     | 8.7                |
| Disallowed                                  | 2.0                |
| rmsd from target geometry                   |                    |
| Bond lengths, Å                             | 0.007              |
| Bond angles, °                              | 1.069              |
| Chirality, Å                                | 0.075              |
| Dihedral angles, °                          | 18.07              |
| PDB ID code                                 | 2XHE               |

Data for the highest resolution shell in parentheses. ESU, estimated overall coordinate error based on maximum likelihood; A.U., asymmetric unit; rmsd, root-mean-square deviation.

\* $R_{\text{sym}}(I) = \sum_{\text{hkl}} \sum_i |I_i(\text{hkl}) - \langle I(\text{hkl}) \rangle| / \sum_{\text{hkl}} \sum_i I_i(\text{hkl})$ ; for *n* independent reflections and *i* observations of a given reflection;  $\langle I(\text{hkl}) \rangle$  – average intensity of the *i* observations.

<sup>†</sup> $R = \sum_{\text{hkl}} |F_{\text{obs}}| - |F_{\text{calc}}| / \sum_{\text{hkl}} |F_{\text{obs}}|$ ;  $R_{\text{work}}$ ,  $\text{hkl} \notin T$ ;  $R_{\text{free}}$ ,  $\text{hkl} \in T$ ;  $R_{\text{all}}$ , all reflections; T, test set.

<sup>‡</sup>According to ref. 27.

**Table S2. Species list and abbreviations**

| Species                                | Abbreviation |
|----------------------------------------|--------------|
| <i>Amphimedon queenslandica</i>        | AmQu         |
| <i>Arabidopsis thaliana</i>            | ArTh         |
| <i>Branchiostoma floridae</i>          | BrFl         |
| <i>Caenorhabditis elegans</i>          | CaEl         |
| <i>Capitella</i> sp. 1                 | CaSp         |
| <i>Chlamydomonas reinhardtii</i>       | ChRe         |
| <i>Chlorella</i> sp. NC64A             | ChSp         |
| <i>Ciona intestinalis</i>              | CIIn         |
| <i>Danio rerio</i>                     | DaRe         |
| <i>Drosophila melanogaster</i>         | DrMe         |
| <i>Entamoeba dispar</i> SAW760         | EnDi         |
| <i>Entamoeba histolytica</i> HM-1:IMSS | EnHi         |
| <i>Gallus gallus</i>                   | GaGa         |
| <i>Hellobdella robusta</i>             | HeRo         |
| <i>Homo sapiens</i>                    | HoSa         |
| <i>Hydra magnipapillata</i>            | HyMa         |
| <i>Laccaria bicolor</i> S238N-H82      | LaBi         |
| <i>Lottia gigantea</i>                 | LoBi         |
| <i>Magnaporthe grisea</i> 70–15        | MaGr         |
| <i>Micromonas</i> sp. RCC299           | MiSt         |
| <i>Monosiga brevicollis</i>            | MoBr         |
| <i>Mus musculus</i>                    | MuMu         |
| <i>Nematostella vectensis</i>          | NeVe         |
| <i>Neurospora crassa</i> N150          | NeCr         |
| <i>Ostreococcus tauri</i>              | OsTa         |
| <i>Saccharomyces cerevisiae</i>        | SaCe         |
| <i>Schizosaccharomyces pombe</i>       | ScPo         |
| <i>Trichoplax adhaerens</i>            | TrAd         |
| <i>Trypanosoma brucei</i> TREU927      | TrBr         |
| <i>Ustilago maydis</i> 521             | UsMa         |
| <i>Volvox carteri</i> f. nagariensis   | VoCa         |
| <i>Yarrowia lipolytica</i> CLIB99      | YaLi         |



Table S3. Identity of used sequences

| Name                         | Species                                | Database source             | Identification no. |
|------------------------------|----------------------------------------|-----------------------------|--------------------|
| <b>Secretory SM proteins</b> |                                        |                             |                    |
| HoSa_Munc18_1a               | <i>Homo sapiens</i>                    | NCBI_nr                     | 4507297            |
| CaEl_Unc18                   | <i>Caenorhabditis elegans</i>          | NCBI_nr                     | 71988800           |
| GaGa_Munc18_1                | <i>Gallus gallus</i>                   | NCBI_nr                     | 46195820           |
| MuMu_Munc18_2                | <i>Mus musculus</i>                    | NCBI_nr                     | 6755688            |
| TrBr_Sec1                    | <i>Trypanosoma brucei</i> TREU927      | NCBI_nr                     | 71744018           |
| MiSt_Sec1                    | <i>Micromonas</i> sp. RCC299           | NCBI_nr                     | 255089845          |
| HeRo_Unc18_2                 | <i>Hellobdella robusta</i>             | DOE JGI                     | Helro1 187018      |
| LoGi_Unc18                   | <i>Lottia gigantea</i>                 | DOE JGI                     | Lotgi 237771       |
| EnDi_Sec1_part               | <i>Entamoeba dispar</i> SAW760         | NCBI_nr                     | 167384806          |
| DaRe_Munc18_2                | <i>Danio rerio</i>                     | NCBI_nr                     | 47086919           |
| VoCa_Sec1                    | <i>Volvox carteri</i> f. nagariensis   | DOE JGI                     | Volca1 67807       |
| GaGa_Munc18_3                | <i>Gallus gallus</i>                   | NCBI_nr                     | 119331098          |
| BrFl_Unc18                   | <i>Branchiostoma floridae</i>          | NCBI_nr                     | 219459049          |
| AmQu_Unc18                   | <i>Amphimedon queenslandica</i>        | Compagen, Assembled by hand |                    |
| NeVe_Unc18                   | <i>Nematostella vectensis</i>          | NCBI_nr                     | 156390747          |
| NeCr_Sec1                    | <i>Neurospora crassa</i> N150          | NCBI_nr                     | 85108189           |
| ArTh_Sec1                    | <i>Arabidopsis thaliana</i>            | NCBI_nr                     | 18391384           |
| HyMa_Unc18                   | <i>Hydra magnipapillata</i>            | NCBI_nr                     | 221121424          |
| SaCe_Sec1                    | <i>Saccharomyces cerevisiae</i>        | NCBI_nr                     | 6320368            |
| MaGr_Sec1                    | <i>Magnaporthe grisea</i> 70-15        | NCBI_nr                     | 145612411          |
| LaBi_Sec1                    | <i>Laccaria bicolor</i> S238N-H82      | NCBI_nr                     | 170087878          |
| DrMe_Unc18                   | <i>Drosophila melanogaster</i>         | NCBI_nr                     | 24657265           |
| ArTh_Sec1_4                  | <i>Arabidopsis thaliana</i>            | NCBI_nr                     | 7267913            |
| EnHi_Sec1                    | <i>Entamoeba histolytica</i> HM-1:IMSS | NCBI_nr                     | 56464018           |
| MuMu_Munc18_1a               | <i>Mus musculus</i>                    | NCBI_nr                     | 165972307          |
| TrAd_Unc18                   | <i>Trichoplax adhaerens</i>            | NCBI_nr                     | 196000262          |
| ChSp_Sec1                    | <i>Chlorella</i> sp. NC64A             | DOE JGI                     | ChINC64A_1 56812   |
| ScPo_Sec1                    | <i>Schizosaccharomyces pombe</i>       | NCBI_nr                     | 19075726           |
| DaRe_Munc18_3                | <i>Danio rerio</i>                     | NCBI_nr                     | 47087331           |
| UsMa_Sec1                    | <i>Ustilago maydis</i> 521             | NCBI_nr                     | 71019769           |
| ChRe_Sec1                    | <i>Chlamydomonas reinhardtii</i>       | NCBI_nr                     | 158273495          |
| DaRe_Munc18_1                | <i>Danio rerio</i>                     | NCBI_nr                     | 68448507           |
| MoBr_Munc18                  | <i>Monosiga brevicollis</i> MX1        | NCBI_nr                     | 167523609          |
| HoSa_Munc18_3                | <i>Homo sapiens</i>                    | NCBI_nr                     | 118600975          |
| MuMu_Munc18_3a               | <i>Mus musculus</i>                    | NCBI_nr                     | 6755690            |
| Ciln_Unc18                   | <i>Ciona intestinalis</i>              | NCBI_nr                     | 198429537          |
| HoSa_Munc18_2a               | <i>Homo sapiens</i>                    | NCBI_nr                     | 188528689          |
| NeVe_Unc18_2                 | <i>Nematostella vectensis</i>          | NCBI_nr                     | 156390749          |
| ArTh_Sec1_3                  | <i>Arabidopsis thaliana</i>            | NCBI_nr                     | 18413751           |
| ArTh_Sec1_2                  | <i>Arabidopsis thaliana</i>            | NCBI_nr                     | 145334974          |
| CaSp_Unc18_1                 | <i>Capitella</i> sp. 1                 | DOE JGI                     | Capca1 150412      |
| YaLi_Sec1                    | <i>Yarrowia lipolytica</i> CLIB99      | NCBI_nr                     | 50553686           |
| HeRo_Unc18                   | <i>Hellobdella robusta</i>             | DOE JGI                     | Helro1 66166       |
| <b>Qbc-SNARE</b>             |                                        |                             |                    |
| MuMu_SN29                    | <i>Mus musculus</i>                    | NCBI_nr                     | 31543752           |
| LoGi_SN25                    | <i>Lottia gigantea</i>                 | DOE JGI                     | Lotgi 197810       |
| HeRo_SN25-2                  | <i>Hellobdella robusta</i>             | DOE JGI                     | Helro1 71107       |
| GaGa_SN23                    | <i>Gallus gallus</i>                   | NCBI_nr                     | 50748211           |
| HeRo_SN29                    | <i>Hellobdella robusta</i>             | DOE JGI                     | Helro1 184904      |
| UsMa_Sec9                    | <i>Ustilago maydis</i> 521             | NCBI_nr                     | 49072430           |
| CaEl_SN25                    | <i>Caenorhabditis elegans</i>          | NCBI_nr                     | 32567202           |
| HyMa_SN29                    | <i>Hydra magnipapillata</i>            | NCBI_est                    | 46968126           |
| ArTh_SN33                    | <i>Arabidopsis thaliana</i>            | NCBI_nr                     | 15240163           |
| GaGa_SN47                    | <i>Gallus gallus</i>                   | NCBI_nr                     | 50732155           |
| HoSa_SN29                    | <i>Homo sapiens</i>                    | NCBI_nr                     | 4759154            |
| DrMe_SN25                    | <i>Drosophila melanogaster</i>         | NCBI_nr                     | 1763657            |
| BrFl_SN47                    | <i>Branchiostoma floridae</i>          | DOE JGI                     | Brafl1 240128      |
| MuMu_SN47                    | <i>Mus musculus</i>                    | NCBI_nr                     | 21362303           |
| MuMu_SN23                    | <i>Mus musculus</i>                    | NCBI_nr                     | 6678049            |
| TrAd_SN25-2                  | <i>Trichoplax adhaerens</i>            | DOE JGI                     | Triad1 63490       |
| HyMa_SNx                     | <i>Hydra magnipapillata</i>            | NCBI_est                    | 47136750           |
| CaEl_SN29                    | <i>Caenorhabditis elegans</i>          | NCBI_nr                     | 17554000           |

Table S3. Cont.

| Name           | Species                              | Database source             | Identification no. |
|----------------|--------------------------------------|-----------------------------|--------------------|
| NeVe_SN29      | <i>Nematostella vectensis</i>        | DOE JGI                     | Nemve1 108962      |
| GaGa_SN25b     | <i>Gallus gallus</i>                 | NCBI_nr                     | 45382033           |
| CaSp_SN25      | <i>Capitella</i> sp. 1               | DOE JGI                     | Capca1 180292      |
| HoSa_SN25a     | <i>Homo sapiens</i>                  | NCBI_nr                     | 18765733           |
| ArTh_SN30      | <i>Arabidopsis thaliana</i>          | NCBI_nr                     | 15222976           |
| HeRo_SN25      | <i>Hellobdella robusta</i>           | DOE JGI                     | Helro1 155336      |
| LoGi_SN29      | <i>Lottia gigantea</i>               | DOE JGI                     | Lotgi1 237114      |
| LoGi_SN47      | <i>Lottia gigantea</i>               | DOE JGI                     | Lotgi1 172501      |
| BrFl_SN29      | <i>Branchiostoma floridae</i>        | NCBI_est                    | 66378306           |
| TrAd_SN47p     | <i>Trichoplax adhaerens</i>          | DOE JGI                     | Triad1 55100       |
| CaSp_SN29      | <i>Capitella</i> sp. 1               | DOE JGI                     | Capca1 19521       |
| DrMe_SN24      | <i>Drosophila melanogaster</i>       | NCBI_nr                     | 17737875           |
| AmQu_SN25      | <i>Amphimedon queenslandica</i>      | Compagen, Assembled by hand |                    |
| NeVe_SN47      | <i>Nematostella vectensis</i>        | NCBI, Assembled by hand     |                    |
| TrAd_SN25      | <i>Trichoplax adhaerens</i>          | DOE JGI                     | Triad1 51809       |
| Ciln_SN25      | <i>Ciona intestinalis</i>            | DOE JGI                     | Cioin2 294632      |
| BrFl_SN25      | <i>Branchiostoma floridae</i>        | NCBI_est                    | 66384552           |
| BrFl_SN25like  | <i>Branchiostoma floridae</i>        | DOE JGI                     | Brafl1 84606       |
| Ciln_SN29      | <i>Ciona intestinalis</i>            | DOE JGI                     | Cioin2 275649      |
| HoSa_SN47      | <i>Homo sapiens</i>                  | NCBI_nr                     | 37589927           |
| SaCe_Sec9      | <i>Saccharomyces cerevisiae</i>      | NCBI_nr                     | 6321446            |
| EnDi_Snp       | <i>Entamoeba dispar</i> SAW760       | NCBI_nr                     | 167395986          |
| DaRe_SN23      | <i>Danio rerio</i>                   | NCBI_nr                     | 41055690           |
| MoBr_SN25      | <i>Monosiga brevicollis</i>          | DOE JGI                     | JGI_XYM16904.rev   |
| HoSa_SN25b     | <i>Homo sapiens</i>                  | NCBI_nr                     | 18765735           |
| ShPo_Sec9      | <i>Schizosaccharomyces pombe</i>     | NCBI_nr                     | 19113435           |
| DaRe_SN29      | <i>Danio rerio</i>                   | NCBI_nr                     | 63102202           |
| DaRe_SN25a     | <i>Danio rerio</i>                   | NCBI_nr                     | 37589801           |
| NeVe_SN25      | <i>Nematostella vectensis</i>        | DOE JGI                     | Nemve1 229104      |
| HoSa_SN23      | <i>Homo sapiens</i>                  | NCBI_nr                     | 18765729           |
| ChRe_SN29      | <i>Chlamydomonas reinhardtii</i>     | DOE JGI                     | Chlre3 155582      |
| GaGa_SN29      | <i>Gallus gallus</i>                 | NCBI_nr                     | 50756211           |
| MuMu_SN25a     | <i>Homo sapiens</i>                  | NCBI_nr                     | 54696236           |
| EnDi_SnpOrNpsn | <i>Entamoeba dispar</i> SAW760       | NCBI_nr                     | 165893407          |
| MuMu_SN25b     | <i>Mus musculus</i>                  | NCBI_nr                     | 6755588            |
| DaRe_SN25b     | <i>Danio rerio</i>                   | NCBI_nr                     | 70887763           |
| VoCa_SN29      | <i>Volvox carteri</i> f. nagariensis | DOE JGI                     | Volca1 104786      |
| SaCe_Spo20     | <i>Saccharomyces cerevisiae</i>      | NCBI_nr                     | 6323659            |
| ArTh_SN29      | <i>Arabidopsis thaliana</i>          | NCBI_nr                     | 15241436           |
| DaRe_SN47      | <i>Danio rerio</i>                   | NCBI_nr                     | 68404785           |
| OsTa_SN25      | <i>Ostreococcus tauri</i>            | DOE JGI                     | Ostta4 36669       |
| MaGr_Sec9      | <i>Magnaporthe grisea</i> 70–15      | NCBI_nr                     | 38101969           |
| YaLi_Sec9      | <i>Yarrowia lipolytica</i> CLIB99    | NCBI_nr                     | 50553382           |
